# Supplementary material for: A green reduction of graphene oxide via starch-based materials
Source: Royal Society of Chemistry journal article supplement (doi:10.1039/c3ra43025a), 2013-01-01
Supplement: c3ra43025a.pdf [file c3ra43025a.pdf]

## **A green reduction of graphene oxide via starch-based materials**

Yan Feng<sup>\*</sup>, Ningning Feng, Guixiang Du

Key Laboratory of Inorganic-Organic Hybrid Functional Material Chemistry, Ministry of Education, Tianjin Key Laboratory of Structure and Performance for Functional Molecules, College of Chemistry, Tianjin Normal University, Tianjin, 300387, P. R. China

\*E-mail: hxyfy@mail.tjnu.edu.cn

### Supplementary Information List:

Fig. S1 FT-IR spectra of soluble starch and glucose.

Fig. S2 SEM images of the GO (a, b) and st-rGO (c, d).

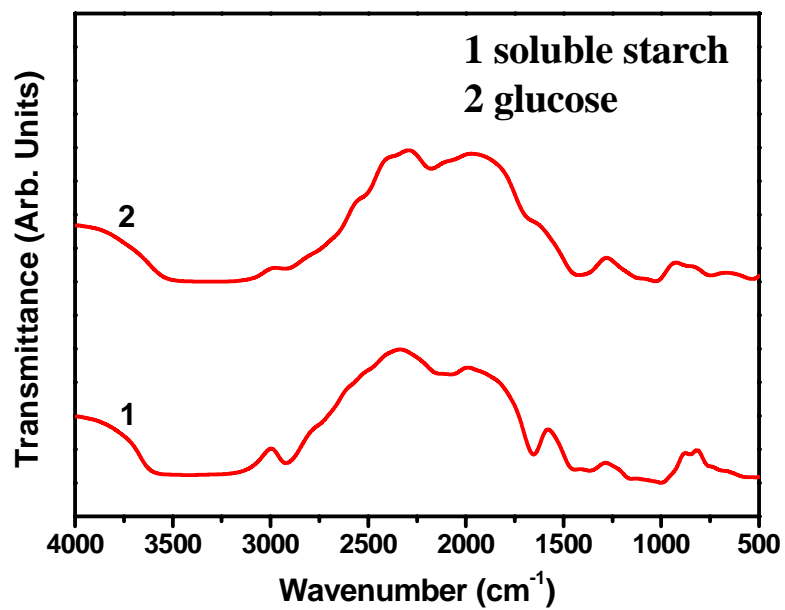

**Fig. S1** FT-IR spectra of soluble starch and glucose.

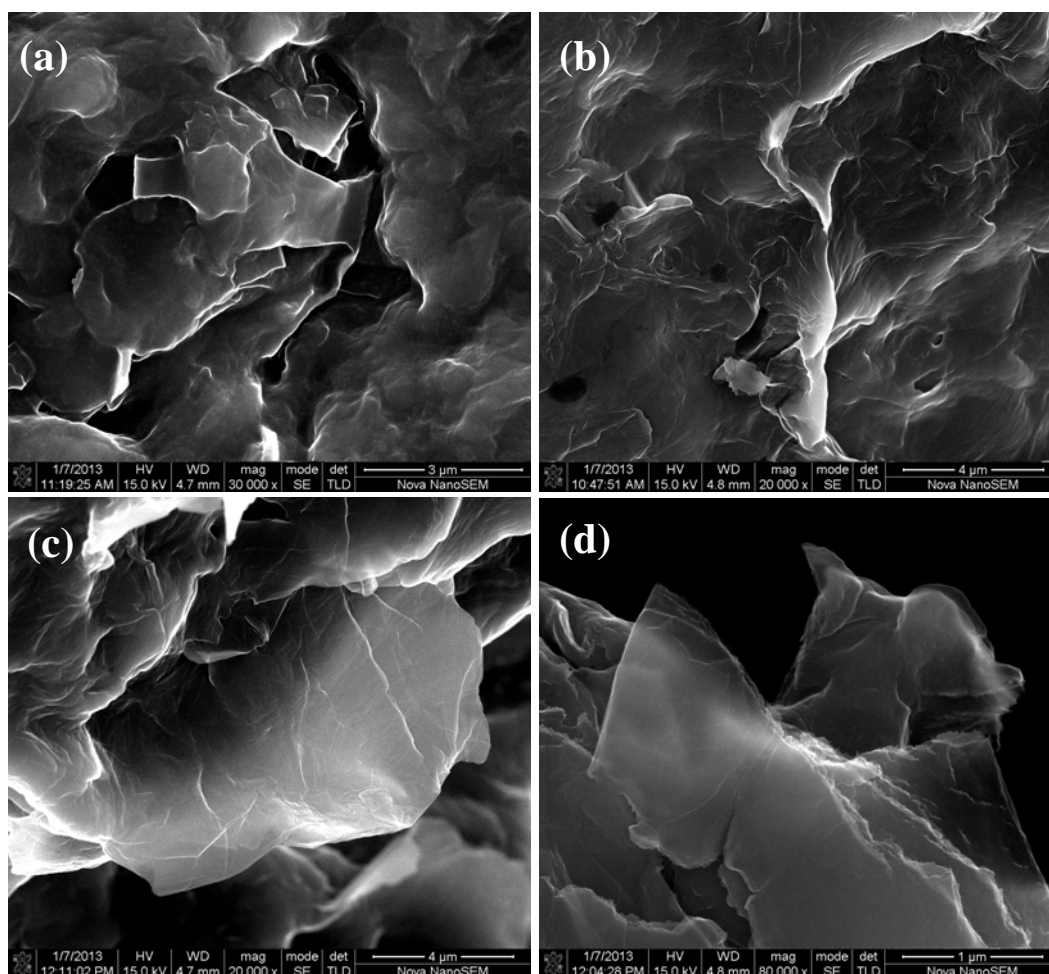

**Fig. S2** SEM images of the GO (a, b) and st-rGO (c, d).
